# Supplementary material for: ADAM17 is regulated by a rapid and reversible mechanism that controls access to its catalytic site
Source: Oxford University Press journal article supplement (doi:10.1242/jcs.069997), 2010-10-28

### A. Amino acid sequence of AD17 constructs

|            | Extracellular domain | Predicted Transmembrane domain | Predicted cytoplasmic domain                                                                                                                                |
|------------|----------------------|--------------------------------|-------------------------------------------------------------------------------------------------------------------------------------------------------------|
| AD17wt     | ...KFLADN            | IVGSVLVFLIFWIPFSILVHCV         | DKKLDKQYESLSLFHHSNIEMLSMDSASVRIIKPFPAPQT<br>PGRLLQALQPAAMMPPVSAAPKLDHQRM DTIQEDPSTDSHVD<br>DDGF EKDPFPNSSTA AKSFEDLTDHPVTRSEKAASF KLRQ<br>SRVDSKETEC -HAtag |
| AD17Δ-cyto | ...KFLADN            | IVGSVLVFLIFWIPFSILVHCV         | DKKLD -HAtag                                                                                                                                                |
| mBTC       | ..QQDRGQ             | ILVCLIVMVVFILVIGVCTCC          | HPLRKHRKKKKEEKMETLDKDKTPISEDIQETNIA                                                                                                                         |
| AD17-BTC   | ...LADNGS            | ILVCLIVMVVFILVIGVCTCC          | HPLRKHRKKKKEEKMETLDKDKTPISEDIQETNIA -HAtag                                                                                                                  |
| mCD62L     | ...KEGDYN            | PLFIPVAVMVTAFSGLAFLIWLA        | RRLKKGKKSQERMDDPY                                                                                                                                           |
| AD17-CD62L | ...KFLADN            | PLFIPVAVMVTAFSGLAFLIWLA        | RRLKKGKKSQERMDDPY -HAtag                                                                                                                                    |

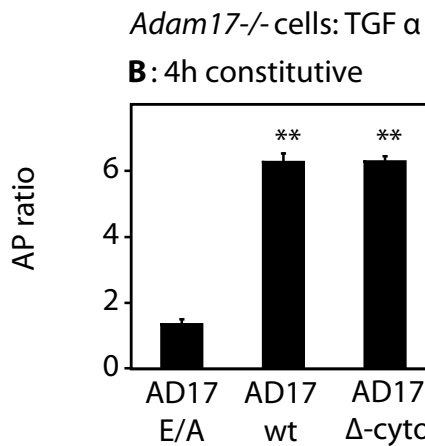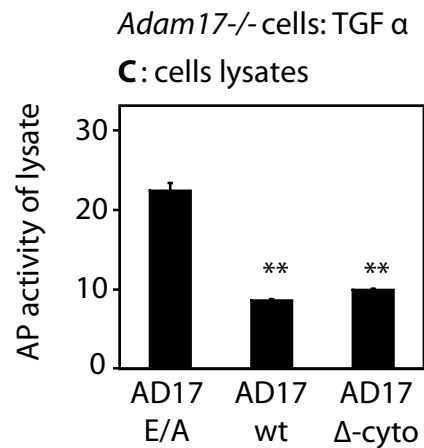

D: WB of transfected ADAM17-HA clones in *Adam17*<sup>-/-</sup> cells

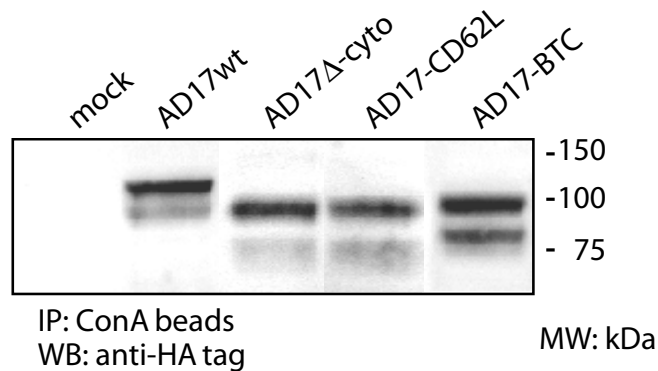

Supplement: jcs069997figs1.pdf [file jcs069997figs1.pdf]
