# Supplementary material for: ADAM17 is regulated by a rapid and reversible mechanism that controls access to its catalytic site
Source: Oxford University Press journal article supplement (doi:10.1242/jcs.069997), 2010-10-28

**A:** Surface expression of CD62L on (CD19<sup>+</sup>CD90.2<sup>-</sup>) B cells

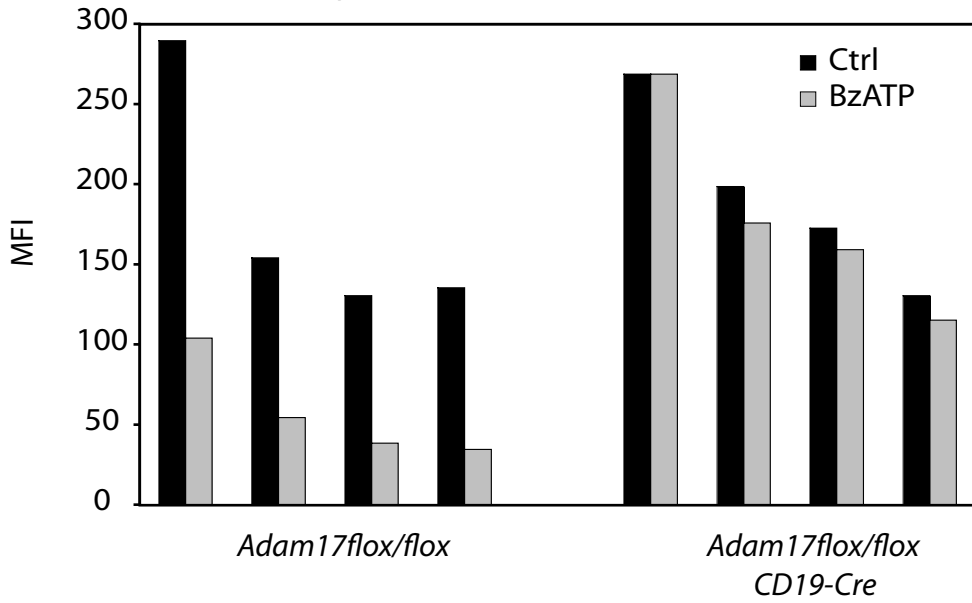

**B:** Surface expression of ADAM10 on (CD19<sup>+</sup>CD90.2<sup>-</sup>) B cells

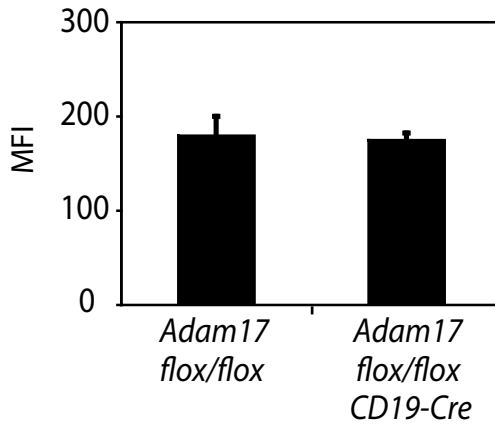

Supplement: jcs069997figs2.pdf [file jcs069997figs2.pdf]
