# Supplementary material for: ADAM17 is regulated by a rapid and reversible mechanism that controls access to its catalytic site
Source: Oxford University Press journal article supplement (doi:10.1242/jcs.069997), 2010-10-28

## Cos7 cells: AR

|       |                 |                  |      |            |                 |    |      |           |                |     |
|-------|-----------------|------------------|------|------------|-----------------|----|------|-----------|----------------|-----|
| Steps | 1 <sup>st</sup> | 5min treatment   | Ctrl | MM<br>+PMA | DPC333<br>+ PMA |    | Ctrl | MM<br>+PV | DPC333<br>+ PV |     |
|       | 2 <sup>nd</sup> | 1min washout     | -    | -          | -               | -  | -    | -         | -              | -   |
|       | 3 <sup>rd</sup> | 20min experiment | Ctrl | Ctrl       | Ctrl            | PV | Ctrl | Ctrl      | Ctrl           | PMA |

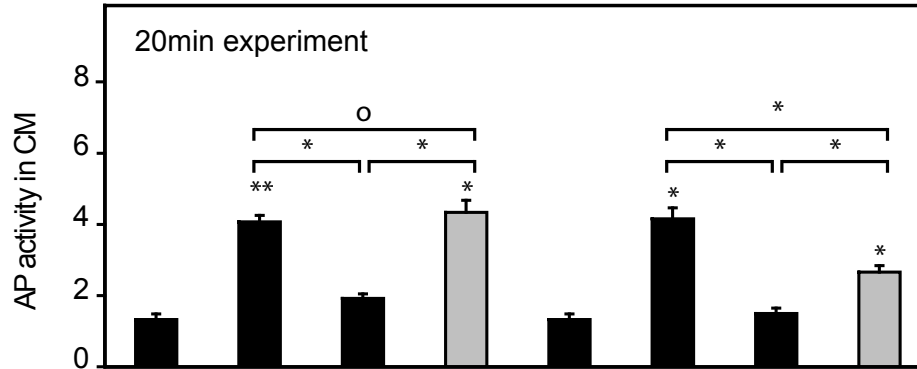

Supplement: jcs069997figs3.pdf [file jcs069997figs3.pdf]
